# Supplementary material for: Hierarchical Bi2Se3–xSx microarchitectures assembled from ultrathin polycrystalline nanosheets: solvothermal synthesis and good electrochemical performance
Source: Royal Society of Chemistry journal article supplement (doi:10.1039/c3ta12030a), 2013-01-01
Supplement: c3ta12030a.pdf [file c3ta12030a.pdf]

# Hierarchical $\text{Bi}_2\text{Se}_{3-x}\text{S}_x$ microarchitectures assembled by ultrathin polycrystalline nanosheets: solvothermal synthesis and good electrochemical performance†

Rencheng Jin,<sup>a\*</sup> Junshen Liu,<sup>a</sup> Yanbin Xu,<sup>a</sup> Guihua Li<sup>a</sup> and Gang Chen<sup>b\*</sup>

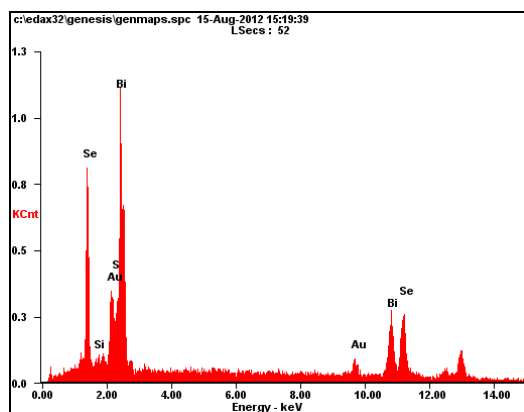

| <i>Element</i> | <i>Wt%</i> | <i>At%</i> |
|----------------|------------|------------|
| <i>SiK</i>     | 00.98      | 04.04      |
| <i>SK</i>      | 04.94      | 17.87      |
| <i>AuL</i>     | 10.61      | 06.25      |
| <i>BiL</i>     | 55.55      | 30.82      |
| <i>SeK</i>     | 27.93      | 41.01      |
| <i>Matrix</i>  | Correction | ZAF        |

Fig. S1 Energy dispersive spectrum of the as-synthesized flower like  $\text{Bi}_2\text{Se}_{3-x}\text{S}_x$ .

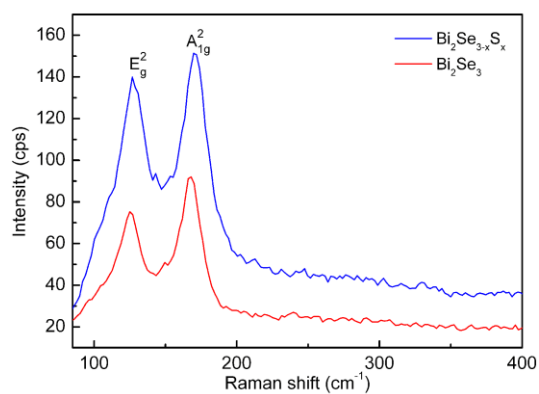

Fig. S2 Raman spectra of Bi<sub>2</sub>Se<sub>3</sub> and Bi<sub>2</sub>Se<sub>3-x</sub>S<sub>x</sub>, Raman spectrum on individual nanoparticles were recorded in the range of 80–400 cm<sup>-1</sup>.
